# Supplementary material
Source: Springer Nature journal article supplement (https://www.springermedizin.de/resource/supplementary/13058_2011_2934_MOESM12_ESM.pdf/9702912)

**A****% IFN $\gamma$  producing CD4<sup>+</sup> T cells**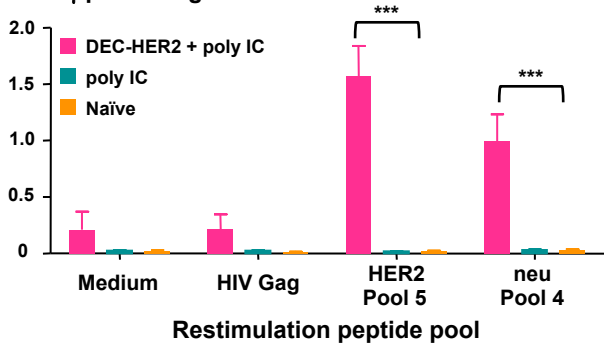**B****% Max Response**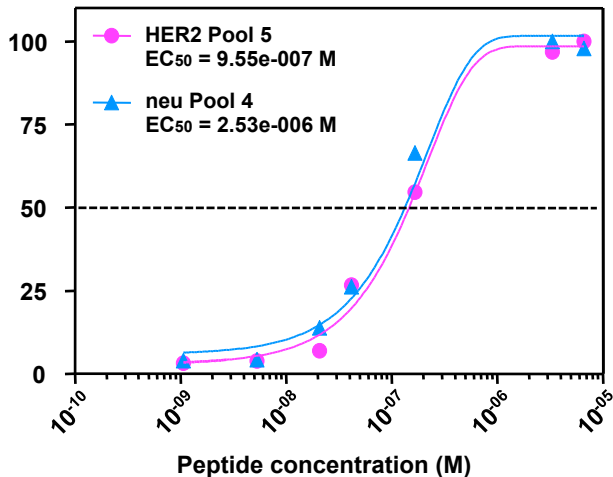

Supplement: MOESM12 [file 9702912]
